# Supplementary material
Source: MDPI journal article supplement (https://www.mdpi.com/2218-2004/12/2/11)
Supplement: s1 [file s1]

## Supplementary information for:

# $\text{FeC}_4\text{H}_2^{2+}$ Encompassing Planar Tetracoordinate Iron: Structure and Bonding Patterns

Shilpa Shajan <sup>1</sup>, Kandasamy Thirunavukkarsu <sup>2</sup>, Vijayanand Chandrasekaran <sup>1,\*</sup>, Venkatesan S. Thimmakondur <sup>3,\*</sup> and Krishnan Thirumoorthy <sup>1,\*</sup>

<sup>1</sup> Department of Chemistry, School of Advanced Sciences, Vellore Institute of Technology,  
Vellore 632014, India; shilpa.shajan2020@vitstudent.ac.in

<sup>2</sup> Vel Tech Rangarajan Dr Sagunthala R&D Institute of Science and Technology, Avadi,  
Chennai 600062, India; drkthirunavukkarasu@veltech.edu.in

<sup>3</sup> Department of Chemistry and Biochemistry, San Diego State University, San Diego, CA  
92182-1030, USA

\* Correspondence: vijayanand.c@vit.ac.in (V.C.); vthimmakondusamy@sdsu.edu (V.S.T.);  
thirumoorthy.krishnan@vit.ac.in (K.T.)

## Contents

|                 |    |
|-----------------|----|
| List of Figures | S2 |
| List of Tables  | S3 |

## List of Figures

|    |                                                                                                                                                                                                                                                                                                                          |     |
|----|--------------------------------------------------------------------------------------------------------------------------------------------------------------------------------------------------------------------------------------------------------------------------------------------------------------------------|-----|
| S1 | Isomers of $\text{FeC}_4\text{H}_2^{2+}$ in the singlet electronic state with ZPVE-corrected relative energies (in $\text{kcal mol}^{-1}$ ), dipole moments (in Debye), and the number of imaginary frequencies (NImag) obtained using $\omega\text{B97X-D}$ functional with SDD and 6-311++G(2d,2p) basis sets.....     | S5  |
| S2 | AdNDP bonding patterns of <b>4s</b> with occupation numbers (ON).....                                                                                                                                                                                                                                                    | S6  |
| S3 | NBO charges (in  e ) on <b>4s</b> obtained using the $\omega\text{B97X-D}$ functional with SDD and 6-311++G (2d,2p) basis sets.....                                                                                                                                                                                      | S7  |
| S4 | The IR vibrational spectrum and Raman spectrum of <b>4s</b> obtained using the $\omega\text{B97X-D}$ functional with SDD and 6-311++G (2d,2p) basis sets.....                                                                                                                                                            | S8  |
| S5 | Isomers of $\text{FeC}_4\text{H}_2^{2+}$ in the triplet electronic state with ZPVE-corrected relative energies (in $\text{kcal mol}^{-1}$ ), dipole moments (in Debye), and the number of imaginary frequencies (NImag) obtained using (U) $\omega\text{B97X-D}$ functional with SDD and 6-311++G(2d,2p) basis sets..... | S9  |
| S6 | Isomers of $\text{FeC}_4\text{H}_2^{2+}$ in the quintet electronic state with ZPVE-corrected relative energies (in $\text{kcal mol}^{-1}$ ), dipole moments (in Debye), and the number of imaginary frequencies (NImag) obtained using (U) $\omega\text{B97X-D}$ functional with SDD and 6-311++G(2d,2p) basis sets..... | S10 |

## List of Tables

|    |                                                                                                                                                                                                                                                                                                                                                                                                                                                                 |     |
|----|-----------------------------------------------------------------------------------------------------------------------------------------------------------------------------------------------------------------------------------------------------------------------------------------------------------------------------------------------------------------------------------------------------------------------------------------------------------------|-----|
| S1 | Total energy (in a.u), point group, zero-point correction (in a.u), ZPVE corrected total energy (E+ZPVE; in a.u), relative energy ( $\Delta E + \text{ZPVE}$ ; in kcal mol <sup>-1</sup> ), dipole moment (in Debye), and the number of imaginary frequencies (NImag) of FeC <sub>4</sub> H <sub>2</sub> <sup>2+</sup> in their corresponding singlet electronic state calculated using $\omega$ B97X-D functional with SDD and 6-311++G(2d,2p) basis sets..... | S11 |
| S2 | Total energy (in a.u), point group, zero-point correction (in a.u), ZPVE corrected total energy (E+ZPVE; in a.u), relative energy ( $\Delta E + \text{ZPVE}$ ; in kcal mol <sup>-1</sup> ), dipole moment (in Debye), and the number of imaginary frequencies (NImag) of FeC <sub>4</sub> H <sub>2</sub> <sup>2+</sup> in their corresponding triplet electronic state calculated using ROHF with SDD and 6-311++G(2d,2p) basis sets.....                       | S13 |
| S3 | Total energy (in a.u), point group, zero-point correction (in a.u), ZPVE corrected total energy (E+ZPVE; in a.u), relative energy ( $\Delta E + \text{ZPVE}$ ; in kcal mol <sup>-1</sup> ), dipole moment (in Debye), and the number of imaginary frequencies (NImag) of FeC <sub>4</sub> H <sub>2</sub> <sup>2+</sup> in their corresponding quintet electronic state calculated using ROHF with SDD and 6-311++G(2d,2p) basis sets.....                       | S14 |
| S4 | Cartesian coordinates of optimized geometries of FeC <sub>4</sub> H <sub>2</sub> <sup>2+</sup> in the singlet electronic state (in Angström units) obtained using $\omega$ B97X-D functional with SDD and 6-311++G(2d,2p) basis sets.....                                                                                                                                                                                                                       | S15 |
| S5 | Cartesian coordinates of optimized geometries of FeC <sub>4</sub> H <sub>2</sub> <sup>2+</sup> in triplet electronic state (in Angström units) obtained using ROHF with SDD and 6-311++G(2d,2p) basis sets.....                                                                                                                                                                                                                                                 | S19 |
| S6 | Cartesian coordinates of optimized geometries of FeC <sub>4</sub> H <sub>2</sub> <sup>2+</sup> in quintet electronic state (in Angström units) obtained using ROHF with SDD and 6-311++G(2d,2p) basis sets.....                                                                                                                                                                                                                                                 | S20 |
| S7 | Total energy (in a.u), point group, zero-point correction (in a.u), ZPVE corrected total energy (E+ZPVE; in a.u), relative energy ( $\Delta E + \text{ZPVE}$ ; in kcal mol <sup>-1</sup> ), dipole moment (in Debye), and the number of imaginary frequencies (NImag) of FeC <sub>4</sub> H <sub>2</sub> <sup>2+</sup> in their corresponding triplet electronic state calculated                                                                               |     |

using (U)ωB97X–D functional with SDD and 6-311++G(2d,2p) basis sets.... S21

S8 Total energy (in a.u), point group, zero-point correction (in a.u), ZPVE corrected total energy (E+ZPVE; in a.u), relative energy ( $\Delta E + ZPVE$ ; in kcal mol<sup>-1</sup>), dipole moment (in Debye), and the number of imaginary frequencies (NImag) of FeC<sub>4</sub>H<sub>2</sub><sup>2+</sup> in their corresponding quintet electronic state calculated using (U)ωB97X–D functional with SDD and 6-311++G(2d,2p) basis sets..... S22

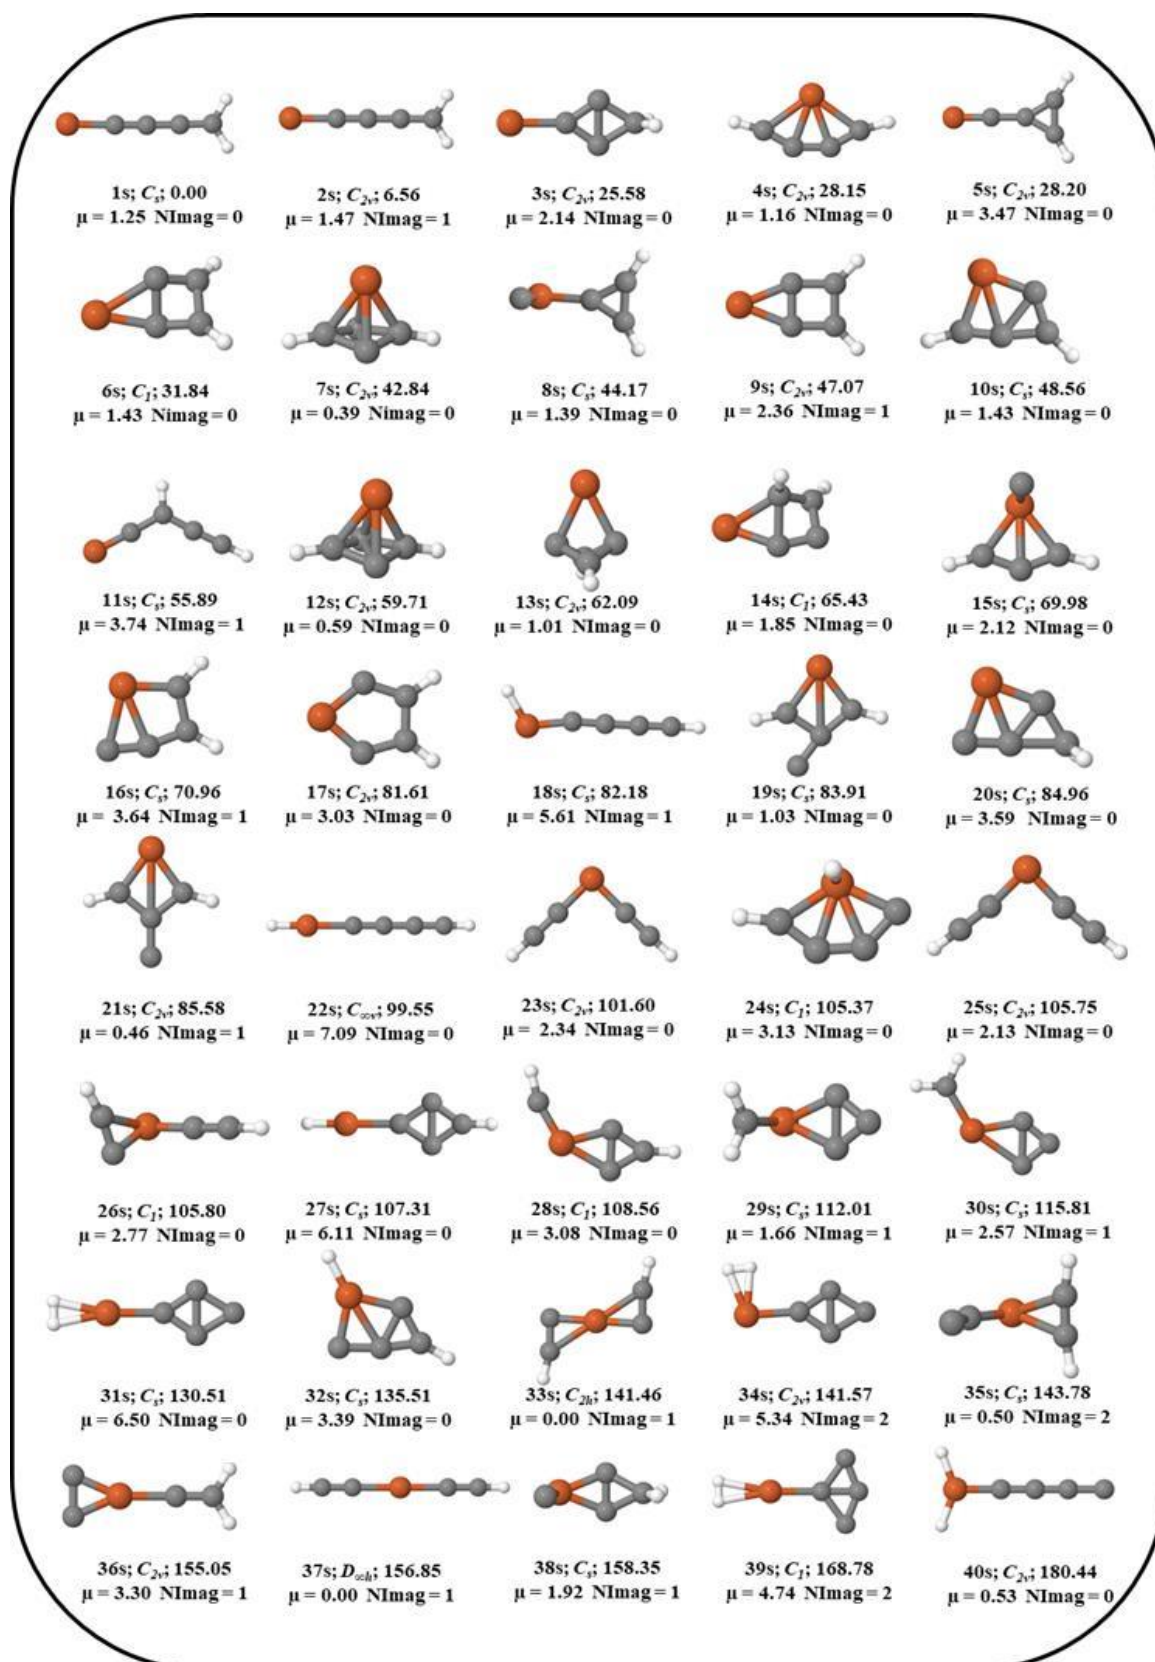

**Figure S1.** Isomers of  $\text{FeC}_4\text{H}_2^{2+}$  in the singlet electronic state with ZPVE-corrected relative energies (in  $\text{kcal mol}^{-1}$ ), dipole moments (in Debye), and the number of imaginary frequencies (NImag) obtained using  $\omega\text{B97X-D}$  functional with SDD and 6-311++G(2d,2p) basis sets.

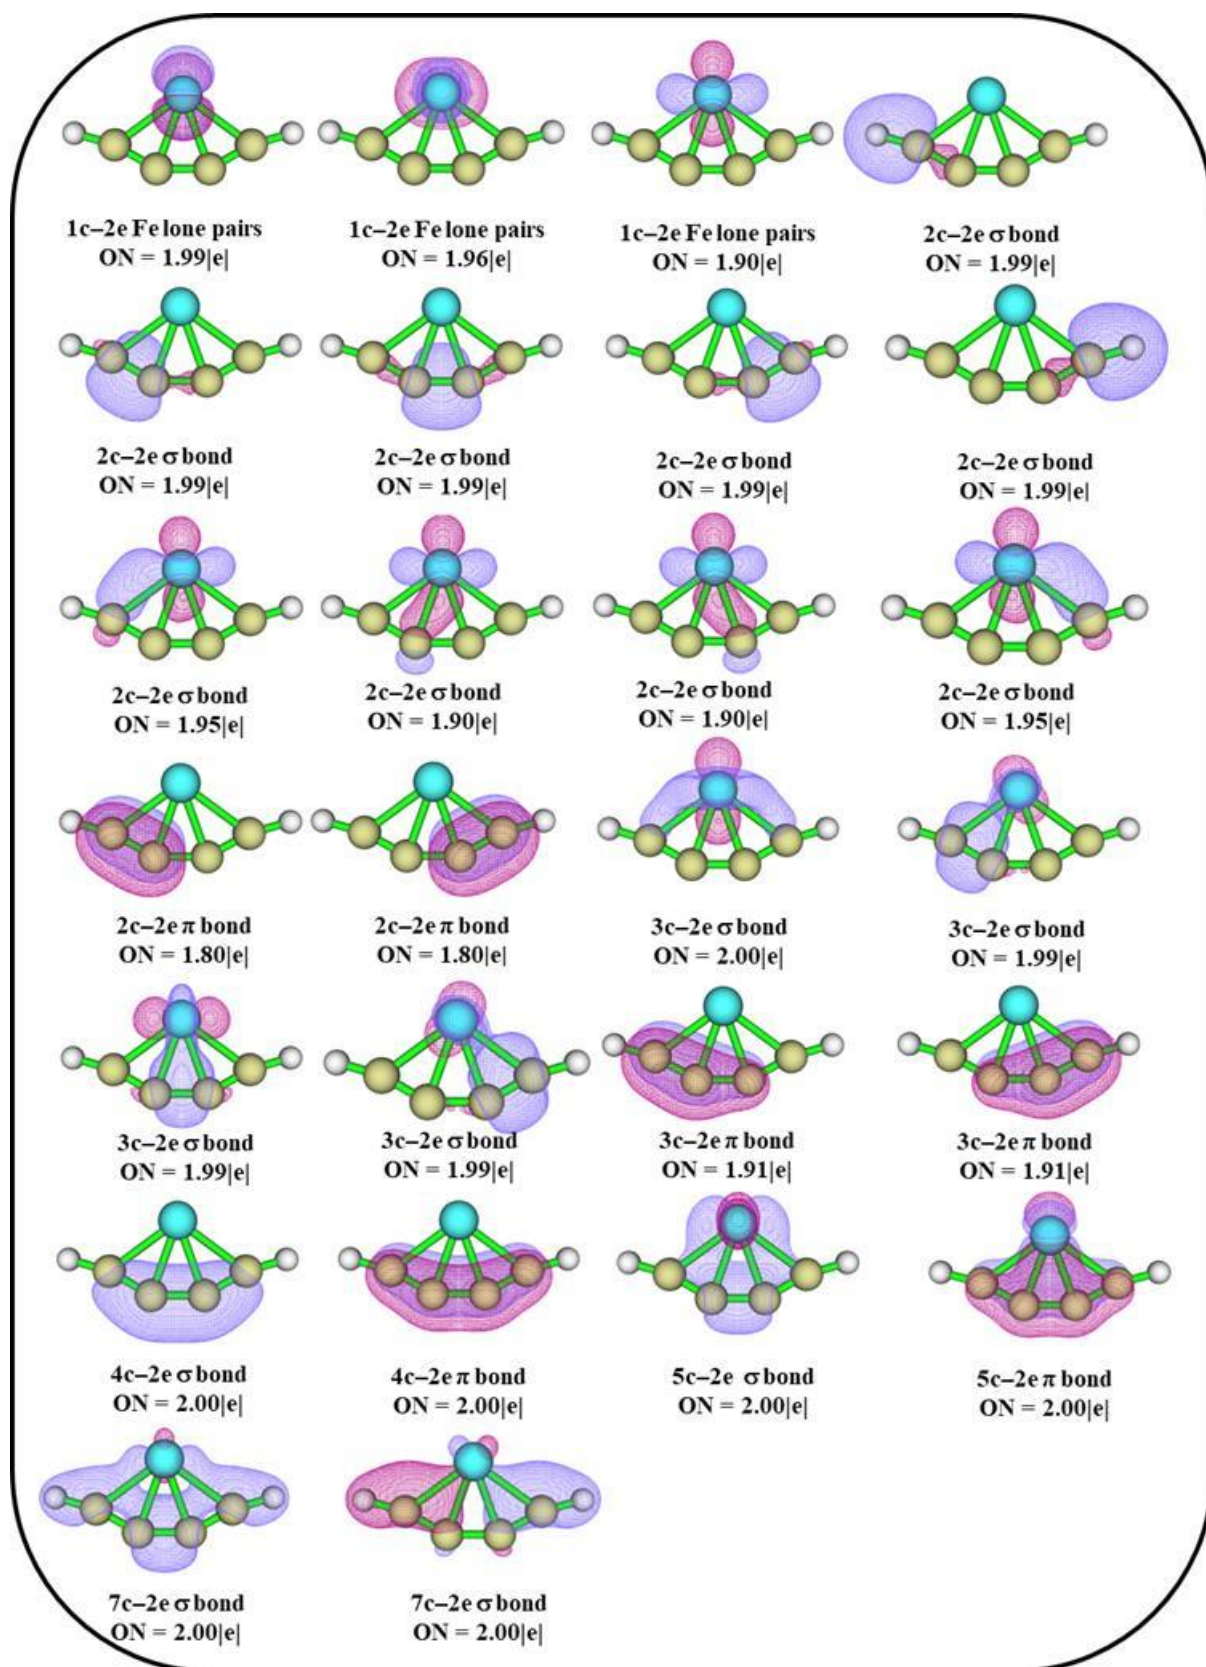

**Figure S2.** AdNDP bonding patterns of 4s with occupation numbers (ON).

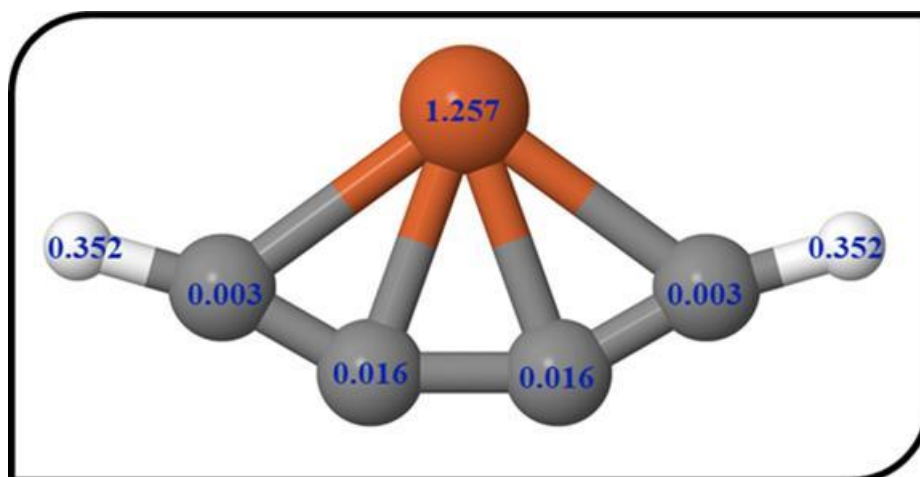

**Figure S3.** NBO charges (in  $|e|$ ) on **4s** obtained using the  $\omega$ B97X-D functional with SDD and 6-311++G (2d,2p) basis sets.

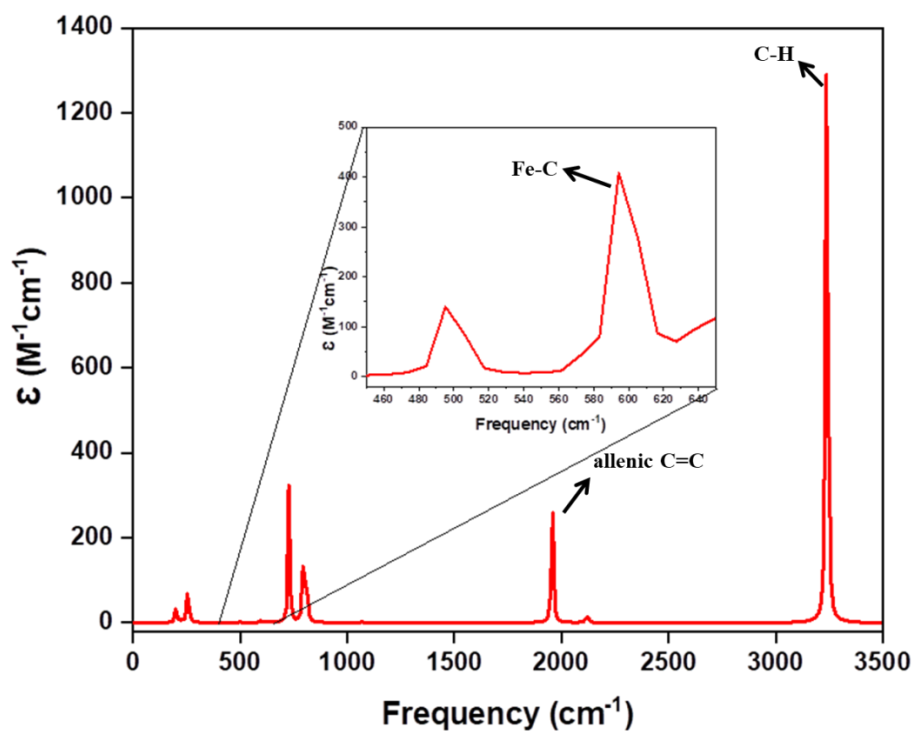

(a)

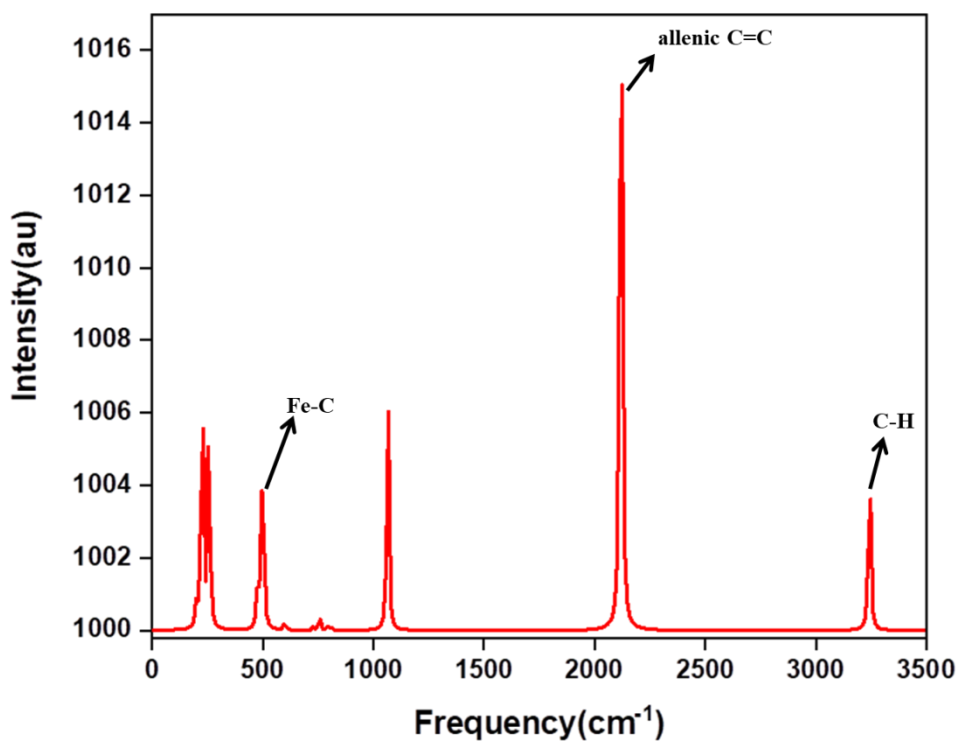

(b)

**Figure S4.** (a) The IR vibrational spectrum and (b) Raman spectrum of **4s** obtained using the  $\omega$ B97X–D functional with SDD and 6–311++G (2d,2p) basis sets.



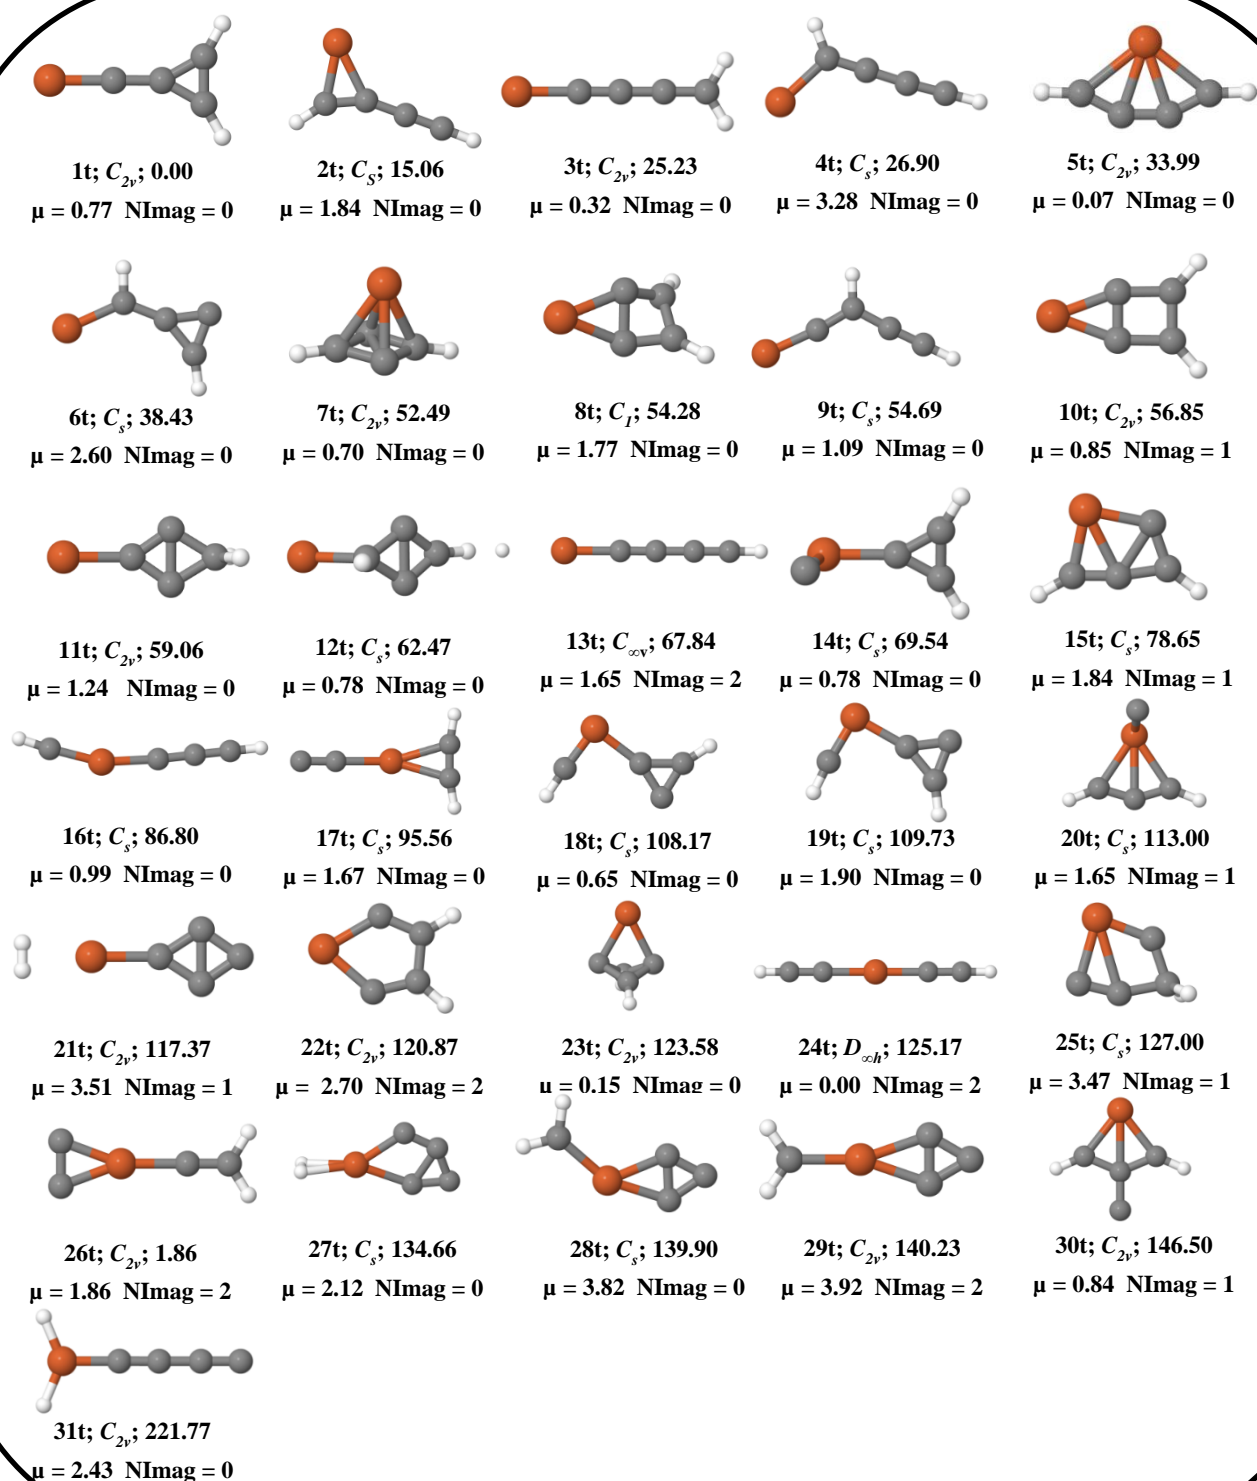

**Figure S5.** Isomers of  $\text{FeC}_4\text{H}_2^+$  in the triplet electronic state with ZPVE-corrected relative energies (in  $\text{kcal mol}^{-1}$ ), dipole moments (in Debye), and the number of imaginary frequencies (NImag) obtained using the (U) $\omega$ B97X–D functional with SDD and 6–311++G (2d,2p) basis sets.

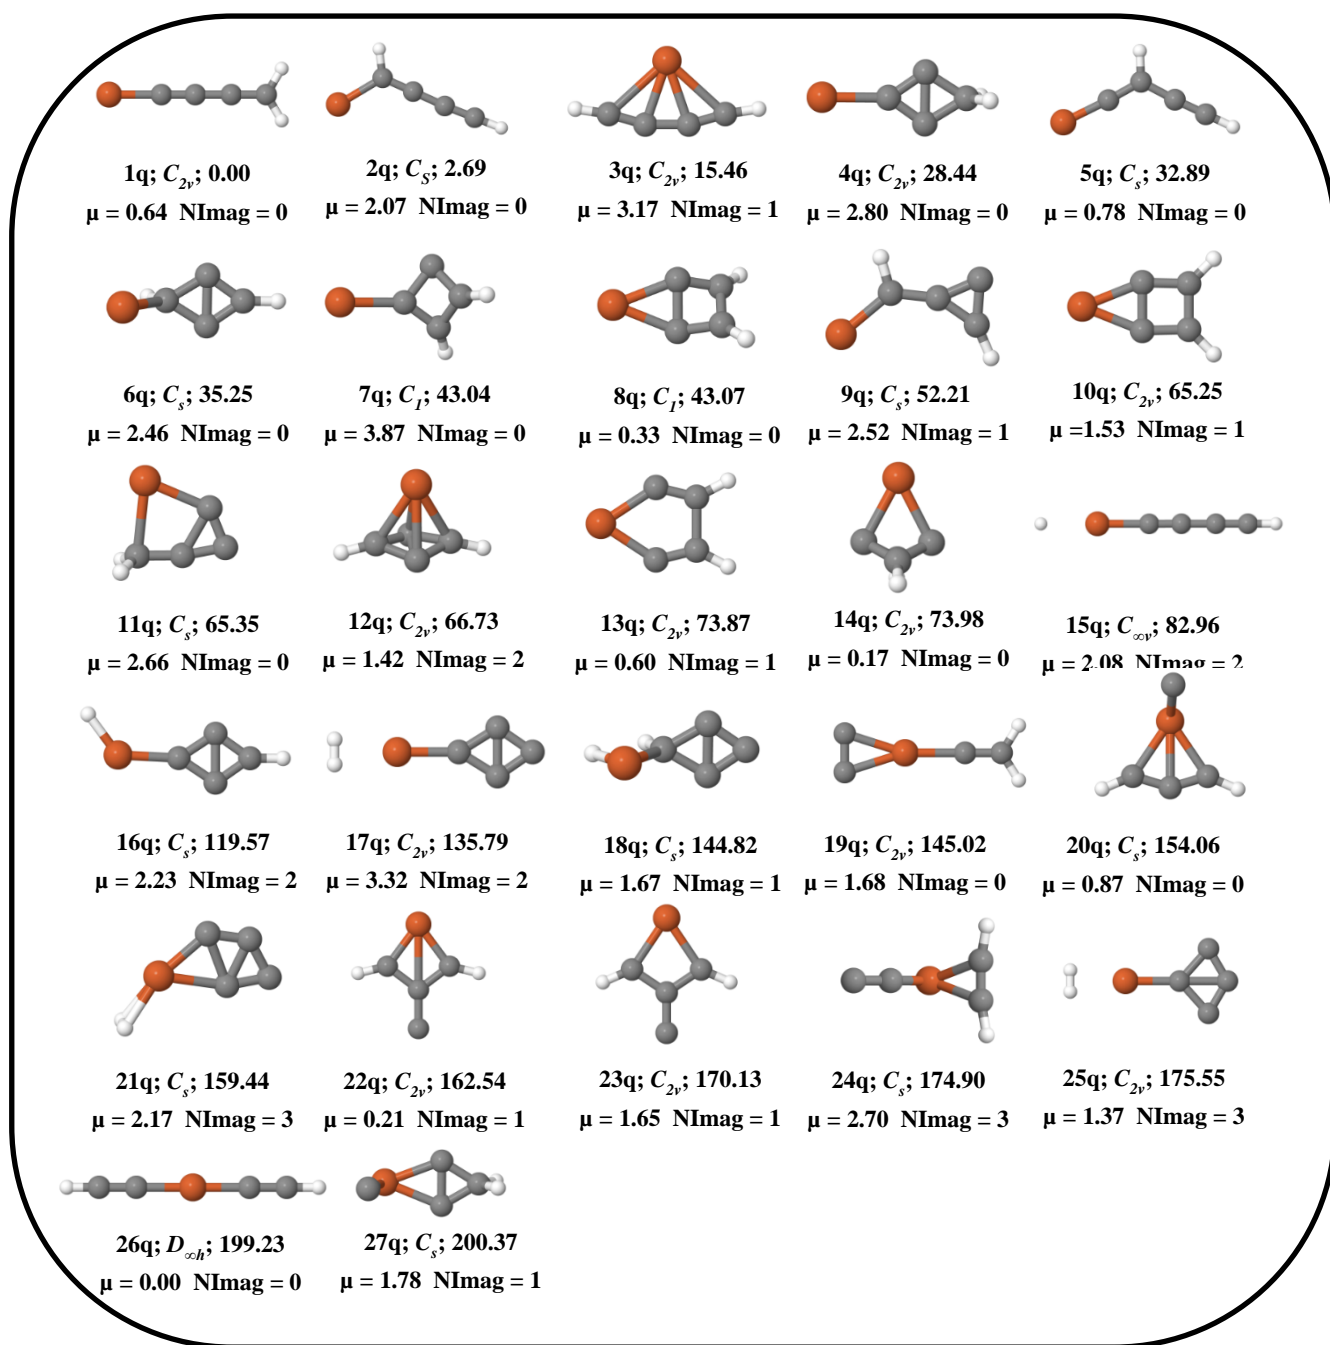

**Figure S6.** Isomers of  $\text{FeC}_4\text{H}_2^{2+}$  in the quintet electronic state with ZPVE-corrected relative energies (in  $\text{kcal mol}^{-1}$ ), dipole moments (in Debye), and the number of imaginary frequencies (NImag) obtained using the (U) $\omega$ B97X–D functional with SDD and 6–311++G (2d,2p) basis sets.

**Table S1.** Total energy (in a.u), point group, zero-point correction (in a.u), ZPVE corrected total energy (E+ZPVE; in a.u), relative energy ( $\Delta E + \text{ZPVE}$ ; in kcal mol<sup>-1</sup>), dipole moment (in Debye), and the number of imaginary frequencies (Nimag) of FeC<sub>4</sub>H<sub>2</sub><sup>2+</sup> in their corresponding singlet electronic state calculated using  $\omega\text{B97X-D}$  functional with SDD and 6-311++G(2d,2p) basis sets.

| Isomer | Energy(a.u)  | Poin Group      | Zero correction (a.u) | E+ZPVE (a.u) | $\Delta E + \text{ZPVE}$ (a.u) | $\Delta E + \text{ZPVE}$ (kcal/mol) | $ \mu $ Debye | Nimag |
|--------|--------------|-----------------|-----------------------|--------------|--------------------------------|-------------------------------------|---------------|-------|
| 1s     | -276.5081389 | Cs              | 0.037799              | -276.470339  | 0                              | 0                                   | 1.2507        | 0     |
| 2s     | -276.49663   | C2v             | 0.036733              | -276.45989   | 0.010449                       | 6.556846442                         | 1.4746        | 1     |
| 3s     | -276.4701718 | C2v             | 0.0406                | -276.429572  | 0.040767                       | 25.58167852                         | 2.1359        | 0     |
| 4s     | -276.4641642 | C2v             | 0.03868               | -276.425484  | 0.044855                       | 28.14693723                         | 1.1615        | 0     |
| 5s     | -276.4650087 | C2v             | 0.039613              | -276.425396  | 0.044943                       | 28.20215807                         | 3.4711        | 0     |
| 6s     | -276.4586515 | C1              | 0.039059              | -276.419592  | 0.050747                       | 31.84422302                         | 1.4264        | 0     |
| 7s     | -276.4396313 | C2v             | 0.037565              | -276.402067  | 0.068272                       | 42.84132647                         | 0.3921        | 0     |
| 8s     | -276.4388896 | Cs              | 0.038943              | -276.399946  | 0.070393                       | 44.17227405                         | 1.3917        | 0     |
| 9s     | -276.4350436 | C2v             | 0.039717              | -276.395327  | 0.075012                       | 47.07074029                         | 2.356         | 1     |
| 10s    | -276.4311395 | Cs              | 0.038187              | -276.392952  | 0.077387                       | 48.56107528                         | 1.4325        | 0     |
| 11s    | -276.417843  | Cs              | 0.036571              | -276.381272  | 0.089067                       | 55.89038588                         | 3.7408        | 1     |
| 12s    | -276.4143135 | C2v             | 0.039124              | -276.37519   | 0.095149                       | 59.70689847                         | 0.5863        | 0     |
| 13s    | -276.4093772 | C2v             | 0.037981              | -276.371396  | 0.098943                       | 62.08766939                         | 1.0148        | 0     |
| 14s    | -276.4048176 | C1              | 0.038744              | -276.366074  | 0.104265                       | 65.42727479                         | 1.8522        | 0     |
| 15s    | -276.3956551 | Cs              | 0.03683               | -276.358826  | 0.111513                       | 69.97546342                         | 2.1238        | 0     |
| 16s    | -276.3943499 | Cs              | 0.037093              | -276.357257  | 0.113082                       | 70.96002577                         | 3.6407        | 1     |
| 17s    | -276.3789125 | C2v             | 0.038623              | -276.340289  | 0.13005                        | 81.60760644                         | 3.0324        | 0     |
| 18s    | -276.3729568 | Cs              | 0.033573              | -276.339384  | 0.130955                       | 82.17550251                         | 5.608         | 1     |
| 19s    | -276.3728461 | Cs              | 0.036234              | -276.336612  | 0.133727                       | 83.91495876                         | 1.0319        | 0     |
| 20s    | -276.3718337 | Cs              | 0.036893              | -276.334941  | 0.135398                       | 84.96352708                         | 3.5905        | 0     |
| 21s    | -276.3703426 | C2v             | 0.03639               | -276.333953  | 0.136386                       | 85.58350644                         | 0.4851        | 1     |
| 22s    | -276.3467418 | C <sub>∞v</sub> | 0.03505               | -276.311692  | 0.158647                       | 99.55249473                         | 7.0915        | 0     |
| 23s    | -276.3443286 | C2v             | 0.035893              | -276.308436  | 0.161903                       | 101.5956656                         | 2.3403        | 0     |
| 24s    | -276.3374112 | C1              | 0.034991              | -276.302421  | 0.167918                       | 105.370135                          | 3.1321        | 0     |
| 25s    | -276.3482493 | C2v             | 0.036284              | -276.301818  | 0.168521                       | 105.7485232                         | 2.1256        | 0     |
| 26s    | -276.3378629 | C1              | 0.036123              | -276.30174   | 0.168599                       | 105.797469                          | 2.7657        | 0     |
| 27s    | -276.3345036 | Cs              | 0.035167              | -276.299337  | 0.171002                       | 107.3053742                         | 6.1113        | 0     |
| 28s    | -276.3330531 | Cs              | 0.035719              | -276.297334  | 0.173005                       | 108.5622757                         | 3.0815        | 0     |
| 29s    | -276.3267376 | Cs              | 0.034893              | -276.291845  | 0.178494                       | 112.0066752                         | 1.656         | 1     |
| 30s    | -276.3204053 | Cs              | 0.034621              | -276.285784  | 0.184555                       | 115.8100101                         | 2.5687        | 1     |
| 31s    | -276.2917441 | C2v             | 0.029389              | -276.262355  | 0.207984                       | 130.5119294                         | 6.5043        | 0     |
| 32s    | -276.2884172 | Cs              | 0.034028              | -276.25439   | 0.215949                       | 135.5100423                         | 3.3857        | 0     |

|     |              |              |          |             |          |             |        |   |
|-----|--------------|--------------|----------|-------------|----------|-------------|--------|---|
| 33s | -276.2799614 | C2h          | 0.035053 | -276.244909 | 0.22543  | 141.4594596 | 0      | 1 |
| 34s | -276.2746893 | Cs           | 0.029951 | -276.244739 | 0.2256   | 141.5661362 | 5.3431 | 2 |
| 35s | -276.2721261 | Cs           | 0.030915 | -276.241211 | 0.229128 | 143.7799896 | 0.4958 | 2 |
| 36s | -276.2552366 | C2v          | 0.031991 | -276.223246 | 0.247093 | 155.0531972 | 3.3015 | 1 |
| 37s | -276.2547452 | D $\infty$ h | 0.034358 | -276.220387 | 0.249952 | 156.8472468 | 0      | 1 |
| 38s | -276.2525505 | Cs           | 0.034557 | -276.217994 | 0.252345 | 158.348877  | 1.9223 | 1 |
| 39s | -276.2293873 | C2v          | 0.028009 | -276.201378 | 0.268961 | 168.7755743 | 4.7392 | 2 |
| 40s | -276.2099469 | C2v          | 0.027158 | -276.182789 | 0.28755  | 180.4403478 | 0.528  | 0 |

**Table S2.** Total energy (in a.u), point group, zero-point correction (in a.u), ZPVE corrected total energy (E+ZPVE; in a.u), relative energy ( $\Delta E + \text{ZPVE}$ ; in kcal mol<sup>-1</sup>), dipole moment (in Debye), and the number of imaginary frequencies (Nimag) of FeC<sub>4</sub>H<sub>2</sub><sup>2+</sup> in their corresponding triplet electronic state calculated using ROHF with SDD and 6-311++G(2d,2p) basis sets.

| Isomer | Energy (a.u) | Point Group | Zero correction(a.u) | E+ZPVE (a.u) | $\Delta E + \text{ZPVE}$ (a.u) | $\Delta E + \text{ZPVE}$ (kcal/mol) | $ \mu $ Debye | Nimag |
|--------|--------------|-------------|----------------------|--------------|--------------------------------|-------------------------------------|---------------|-------|
| 1t     | -274.8298502 | C2v         | 0.041499             | -274.788351  | 0                              | 0                                   | 4.6044        | 0     |
| 2t     | -274.8256918 | C2v         | 0.042439             | -274.783253  | 0.005098                       | 3.199043273                         | 4.0318        | 0     |
| 3t     | -274.7419577 | C2v         | 0.038729             | -274.703228  | 0.085123                       | 53.41548853                         | 0.4864        | 1     |
| 4t     | -274.5868034 | Cs          | 0.030855             | -274.555949  | 0.232402                       | 145.8344556                         | 2.6412        | 1     |

**Table S3.** Total energy (in a.u), point group, zero-point correction (in a.u), ZPVE corrected total energy (E+ZPVE; in a.u), relative energy ( $\Delta E + \text{ZPVE}$ ; in kcal mol<sup>-1</sup>), dipole moment (in Debye), and the number of imaginary frequencies (NImag) of FeC<sub>4</sub>H<sub>2</sub><sup>2+</sup> in their corresponding quintet electronic state calculated using ROHF with SDD and 6-311++G(2d,2p) basis sets.

| Isomer | Energy (a.u) | Point Group     | Zero correction (a.u) | E+ZPVE (a.u) | $\Delta E + \text{ZPVE}$ (a.u) | $\Delta E + \text{ZPVE}$ (kcal/mol) | Dipole moment (Debye) | NImag |
|--------|--------------|-----------------|-----------------------|--------------|--------------------------------|-------------------------------------|-----------------------|-------|
| 1q     | -274.9305578 | C <sub>2v</sub> | 0.042217              | -274.888341  | 0                              | 0                                   | 4.4949                | 0     |
| 2q     | -274.8551817 | C <sub>2v</sub> | 0.039958              | -274.815223  | 0.073118                       | 45.88223735                         | 2.0085                | 1     |
| 3q     | -274.8389778 | C <sub>2v</sub> | 0.037276              | -274.801702  | 0.086639                       | 54.36679288                         | 3.341                 | 2     |
| 4q     | -274.6103434 | C <sub>2v</sub> | 0.038443              | -274.5719    | 0.316441                       | 198.5697239                         | 2.8418                | 2     |

**Table S4.** Cartesian coordinates of optimized geometries of  $\text{FeC}_4\text{H}_2^{2+}$  in the singlet electronic state (in Angström units) obtained using  $\omega\text{B97X-D}$  functional with SDD and 6-311++G(2d,2p) basis sets.

| 1s  |           |           |           | 2s  |           |           |
|-----|-----------|-----------|-----------|-----|-----------|-----------|
| C   | 0.000000  | 0.000000  | 0.103840  | C   | 0.000000  | -2.695925 |
| C   | 0.000000  | 0.000000  | -1.116934 | C   | 0.000000  | 0.769099  |
| C   | 0.000000  | 0.000000  | -2.447412 | C   | 0.000000  | -0.769099 |
| C   | 0.000000  | 0.000000  | -3.719511 | C   | 0.000000  | 0.000000  |
| Fe  | 0.000000  | 0.000000  | 1.986466  | Fe  | 0.000000  | 0.000000  |
| H   | 0.000000  | 0.938049  | -4.284009 | H   | 0.923129  | 0.000000  |
| H   | 0.000000  | -0.938049 | -4.284009 | H   | -0.923129 | 0.000000  |
| 3s  |           |           |           | 4s  |           |           |
| C   | 0.000000  | 1.748412  | -0.513345 | Fe  | 0.000000  | 0.000000  |
| C   | 0.000000  | 0.677309  | -1.126090 | C   | 0.000000  | 0.682065  |
| C   | 0.000000  | -0.677309 | -1.126090 | C   | 0.000000  | -0.682065 |
| C   | 0.000000  | -1.748412 | -0.513345 | C   | 0.000000  | 0.000000  |
| H   | 0.000000  | 2.791092  | -0.212855 | C   | 0.000000  | 0.000000  |
| H   | 0.000000  | -2.791092 | -0.212855 | H   | 0.000000  | 1.624126  |
| Fe  | 0.000000  | 0.000000  | 0.773036  | H   | 0.000000  | -1.624126 |
| 5s  |           |           |           | 6s  |           |           |
| C   | -0.477895 | -0.563707 | 0.250297  | C   | 0.000000  | 1.142732  |
| C   | -1.912969 | 0.649325  | 0.164077  | C   | 0.811343  | 0.000000  |
| C   | -1.794237 | -0.776891 | -0.075053 | C   | -0.811343 | 0.000000  |
| C   | -0.677450 | 0.729305  | -0.449283 | C   | 0.000000  | -1.142732 |
| Fe  | 1.312637  | 0.001098  | 0.017337  | Fe  | 0.000000  | 0.000000  |
| H   | -2.393904 | -1.554556 | -0.544010 | H   | 0.000000  | 2.207151  |
| H   | -2.559361 | 1.297827  | 0.753014  | H   | 0.000000  | -2.207151 |
| 7s  |           |           |           | 8s  |           |           |
| C   | -0.113306 | 2.049251  | 0.678644  | C   | 0.000000  | 0.708276  |
| C   | 1.292191  | -1.237962 | 0.000000  | C   | 0.000000  | -0.708276 |
| C   | -0.113306 | 2.049251  | -0.678644 | C   | 0.000000  | 0.714875  |
| C   | -0.113306 | 0.862046  | 0.000000  | C   | 0.000000  | -0.714875 |
| Fe  | -0.211363 | -1.059729 | 0.000000  | Fe  | 0.000000  | 0.000000  |
| H   | -0.109106 | 2.608716  | 1.606317  | H   | 0.000000  | 1.486677  |
| H   | -0.109106 | 2.608716  | -1.606317 | H   | 0.000000  | -1.486677 |
| 9s  |           |           |           | 10s |           |           |
| C   | -0.910388 | -1.682103 | 0.000000  | H   | 1.270773  | 1.958017  |
| C   | -1.158983 | -0.397993 | 0.000000  | H   | 4.147374  | -1.214669 |
| C   | 0.408776  | -1.091873 | 0.000000  | C   | -0.196920 | 0.347653  |
| C   | 1.452225  | -0.382779 | 0.000000  | C   | 1.147771  | 0.869130  |
| Fe  | 0.000000  | 0.929949  | 0.000000  | C   | 2.224787  | 0.068015  |
| H   | -1.262109 | -2.713620 | 0.000000  | C   | 3.247804  | -0.615004 |
| H   | 2.512333  | -0.136563 | 0.000000  | Fe  | -1.690723 | -0.183158 |
| 11s |           |           |           | 12s |           |           |

|     |           |           |           |     |           |           |           |
|-----|-----------|-----------|-----------|-----|-----------|-----------|-----------|
| C   | 0.000000  | 1.128150  | -0.822134 | C   | 0.000000  | 0.941538  | -1.305390 |
| C   | 0.841633  | 0.000000  | -0.979080 | C   | -0.928827 | 0.000000  | -0.773077 |
| C   | -0.841633 | 0.000000  | -0.979080 | C   | 0.000000  | -0.941538 | -1.305390 |
| C   | 0.000000  | -1.128150 | -0.822134 | C   | 0.928827  | 0.000000  | -0.773077 |
| Fe  | 0.000000  | 0.000000  | 0.905745  | Fe  | 0.000000  | 0.000000  | 1.100466  |
| H   | 0.000000  | 2.204588  | -0.967405 | H   | 0.000000  | 1.895059  | -1.835256 |
| H   | 0.000000  | -2.204588 | -0.967405 | H   | 0.000000  | -1.895059 | -1.835256 |
| 13s |           |           |           | 14s |           |           |           |
| C   | -1.783429 | 0.480513  | 0.423095  | C   | 0.453407  | -0.885266 | 1.213576  |
| C   | -1.707394 | -0.816620 | -0.082470 | C   | 0.453407  | 1.593437  | 0.000000  |
| C   | -0.400162 | -0.879081 | -0.188170 | C   | 0.676433  | -1.278023 | 0.000000  |
| Fe  | 1.183827  | 0.031926  | 0.089128  | C   | 0.453407  | -0.885266 | -1.213576 |
| H   | -2.346403 | 0.970173  | 1.217144  | Fe  | -0.516602 | 0.420839  | 0.000000  |
| H   | -0.838406 | 1.171771  | -1.479165 | H   | 0.605860  | -1.105553 | 2.270271  |
| C   | -0.708129 | 0.719850  | -0.495006 | H   | 0.605860  | -1.105553 | -2.270271 |
| 15s |           |           |           | 16s |           |           |           |
| C   | -0.697427 | -1.116647 | 0.000000  | C   | 0.000000  | 0.701611  | -1.622319 |
| C   | 0.580050  | -1.591118 | 0.000000  | C   | 0.000000  | -0.701611 | -1.622319 |
| C   | -1.760934 | -0.337194 | 0.000000  | C   | 0.000000  | 1.109062  | -0.252284 |
| C   | 1.321102  | -0.340443 | 0.000000  | C   | 0.000000  | -1.109062 | -0.252284 |
| Fe  | 0.000000  | 0.891767  | 0.000000  | Fe  | 0.000000  | 0.000000  | 1.058340  |
| H   | 0.928832  | -2.626177 | 0.000000  | H   | 0.000000  | 1.337285  | -2.510808 |
| H   | 2.414422  | -0.247354 | 0.000000  | H   | 0.000000  | -1.337285 | -2.510808 |
| 17s |           |           |           | 18s |           |           |           |
| C   | 3.376479  | -1.620108 | 0.000000  | C   | -1.026358 | -0.581161 | 0.000000  |
| C   | 2.278868  | -1.073548 | 0.000000  | C   | -0.501259 | -2.413016 | 0.000000  |
| C   | 1.110049  | -0.476841 | 0.000000  | C   | 0.233212  | -1.276586 | 0.000000  |
| C   | 0.000000  | 0.131458  | 0.000000  | C   | 1.252937  | -0.291034 | 0.000000  |
| H   | 4.343306  | -2.103180 | 0.000000  | H   | -2.079383 | -0.882325 | 0.000000  |
| Fe  | -1.660284 | 0.697085  | 0.000000  | H   | 2.328189  | -0.489700 | 0.000000  |
| H   | -1.768300 | 2.213205  | 0.000000  | Fe  | 0.000000  | 1.105493  | 0.000000  |
| 19s |           |           |           | 20s |           |           |           |
| C   | 0.817812  | -1.887580 | 0.000000  | C   | 0.000000  | 1.115491  | -0.391301 |
| C   | 0.949511  | -0.498235 | 0.000000  | C   | 0.000000  | 0.000000  | -2.664934 |
| C   | -1.563625 | -0.055859 | 0.000000  | C   | 0.000000  | 0.000000  | -1.284770 |
| C   | -0.512732 | -0.888431 | 0.000000  | C   | 0.000000  | -1.115491 | -0.391301 |
| Fe  | 0.000000  | 0.956659  | 0.000000  | Fe  | 0.000000  | 0.000000  | 1.144685  |
| H   | 0.927101  | -2.446244 | 0.941113  | H   | 0.000000  | 2.168060  | -0.683983 |
| H   | 0.927101  | -2.446244 | -0.941113 | H   | 0.000000  | -2.168060 | -0.683983 |
| 21s |           |           |           | 22s |           |           |           |
| C   | 0.000000  | 0.000000  | -3.893290 | C   | 0.000000  | 2.168121  | -1.232321 |
| C   | 0.000000  | 0.000000  | -2.649729 | C   | 0.000000  | 1.269845  | -0.366819 |
| C   | 0.000000  | 0.000000  | -1.350823 | C   | 0.000000  | -1.269845 | -0.366819 |
| C   | 0.000000  | 0.000000  | -0.058165 | C   | 0.000000  | -2.168121 | -1.232321 |
| H   | 0.000000  | 0.000000  | -4.977033 | Fe  | 0.000000  | 0.000000  | 0.888206  |
| Fe  | 0.000000  | 0.000000  | 1.896762  | H   | 0.000000  | -2.975648 | -1.951840 |
| H   | 0.000000  | 0.000000  | 3.373275  | H   | 0.000000  | 2.975648  | -1.951840 |



| 23s |           |           |           | 24s |           |           |           |
|-----|-----------|-----------|-----------|-----|-----------|-----------|-----------|
| Fe  | -0.125029 | -0.638179 | -0.068936 | Fe  | 0.000000  | 0.000000  | 0.851992  |
| C   | -1.640910 | 0.399314  | 0.050234  | C   | 0.000000  | 2.179000  | -1.161395 |
| C   | -0.590942 | 1.238198  | 0.011786  | C   | 0.000000  | 1.203460  | -0.381544 |
| C   | 0.716402  | 1.105001  | -0.036800 | C   | 0.000000  | -1.203460 | -0.381544 |
| H   | -0.060947 | -0.819970 | 1.371504  | C   | 0.000000  | -2.179000 | -1.161395 |
| H   | 2.675432  | -0.099884 | 0.111050  | H   | 0.000000  | 3.040088  | -1.818266 |
| C   | 1.621496  | 0.176236  | 0.026409  | H   | 0.000000  | -3.040088 | -1.818266 |
| 25s |           |           |           | 26s |           |           |           |
| C   | -1.566899 | 0.927677  | -0.339558 | C   | 0.000000  | 0.461766  | 0.000000  |
| C   | 1.320531  | 0.084480  | -0.003545 | C   | -0.798027 | 1.673685  | 0.000000  |
| C   | -1.259559 | 0.513144  | 0.831033  | C   | -0.001659 | 2.797486  | 0.000000  |
| C   | 2.487690  | 0.519334  | 0.013274  | C   | 0.796742  | 1.674752  | 0.000000  |
| H   | -1.940477 | 1.518305  | -1.172987 | Fe  | 0.000727  | -1.557938 | 0.000000  |
| H   | 3.526610  | 0.828565  | 0.029999  | H   | 0.001243  | -3.027570 | 0.000000  |
| Fe  | -0.287566 | -0.562103 | -0.071701 | H   | -0.002483 | 3.887822  | 0.000000  |
| 27s |           |           |           | 28s |           |           |           |
| C   | -0.770415 | -2.093417 | 0.000000  | C   | -0.493191 | 1.765453  | 0.000000  |
| C   | -1.246231 | -0.814065 | 0.000000  | C   | -0.493191 | -1.050189 | 0.790579  |
| C   | 0.158925  | -1.114050 | 0.000000  | C   | -0.493191 | -1.050189 | -0.790579 |
| C   | 1.574208  | 1.273503  | 0.000000  | C   | -1.100710 | -1.872568 | 0.000000  |
| Fe  | 0.000000  | 0.704296  | 0.000000  | Fe  | 0.661194  | 0.337784  | 0.000000  |
| H   | -0.978794 | -3.162371 | 0.000000  | H   | -0.854668 | 2.231292  | 0.925300  |
| H   | 2.679873  | 1.338849  | 0.000000  | H   | -0.854668 | 2.231292  | -0.925300 |
| 29s |           |           |           | 30s |           |           |           |
| C   | 1.784604  | 1.271103  | 0.000000  | C   | 0.000000  | 0.000000  | -0.586218 |
| C   | 0.000081  | -1.300537 | 0.000000  | C   | 0.000000  | 0.772603  | -1.727024 |
| C   | -1.593434 | -0.990856 | 0.000000  | C   | 0.000000  | -0.772603 | -1.727024 |
| C   | -0.972584 | -2.131339 | 0.000000  | C   | 0.000000  | 0.000000  | -3.013246 |
| Fe  | 0.000000  | 0.611657  | 0.000000  | Fe  | 0.000000  | 0.000000  | 1.378952  |
| H   | 1.997941  | 2.349831  | 0.000000  | H   | 0.000000  | 0.390554  | 3.234159  |
| H   | 2.690053  | 0.656860  | 0.000000  | H   | 0.000000  | -0.390554 | 3.234159  |
| 31s |           |           |           | 32s |           |           |           |
| C   | -1.020311 | -0.627698 | 0.000000  | Fe  | 0.000000  | 0.000000  | 0.000000  |
| C   | 0.439230  | -1.137731 | 0.000000  | C   | 1.275488  | -1.696415 | 0.000000  |
| C   | 1.463884  | -0.133846 | 0.000000  | C   | 0.000000  | 1.770386  | 0.000000  |
| C   | -0.652110 | -1.950331 | 0.000000  | C   | 0.000000  | -1.770386 | 0.000000  |
| Fe  | 0.000000  | 0.913750  | 0.000000  | C   | -1.275488 | 1.696415  | 0.000000  |
| H   | -0.409366 | 2.333901  | 0.000000  | H   | 2.349640  | -1.874741 | 0.000000  |
| H   | -0.974785 | -2.993751 | 0.000000  | H   | -2.349640 | 1.874741  | 0.000000  |
| 33s |           |           |           | 34s |           |           |           |
| C   | 0.000000  | 0.510187  | 0.000000  | C   | 1.748720  | -1.809444 | 0.000000  |
| C   | -0.779946 | 1.647805  | 0.000000  | C   | 0.463720  | -1.406768 | 0.000000  |
| C   | -0.011001 | 2.937294  | 0.000000  | C   | 0.463720  | 1.555413  | 0.610937  |
| C   | 0.766369  | 1.651649  | 0.000000  | C   | 0.463720  | 1.555413  | -0.610937 |
| Fe  | -0.115945 | -1.426598 | 0.000000  | Fe  | -0.768520 | -0.106206 | 0.000000  |
| H   | 1.532939  | -2.088247 | 0.000000  | H   | 0.571121  | 1.696836  | 1.679516  |

|     |           |           |           |     |          |           |           |
|-----|-----------|-----------|-----------|-----|----------|-----------|-----------|
| H   | 1.629089  | -1.301807 | 0.000000  | H   | 0.571121 | 1.696836  | -1.679516 |
| 35s |           |           |           | 36s |          |           |           |
| C   | 0.000000  | 0.700964  | 1.986460  | H   | 0.000000 | 0.000000  | 4.349293  |
| C   | 0.000000  | -0.700964 | 1.986460  | C   | 0.000000 | 0.000000  | 3.265411  |
| C   | 0.000000  | 0.000000  | -1.593518 | C   | 0.000000 | 0.000000  | 1.995264  |
| C   | 0.000000  | 0.000000  | -2.872714 | Fe  | 0.000000 | 0.000000  | 0.000000  |
| Fe  | 0.000000  | 0.000000  | 0.379451  | C   | 0.000000 | 0.000000  | -1.995264 |
| H   | 0.000000  | 0.938416  | -3.452930 | C   | 0.000000 | 0.000000  | -3.265411 |
| H   | 0.000000  | -0.938416 | -3.452930 | H   | 0.000000 | 0.000000  | -4.349293 |
| 37s |           |           |           | 38s |          |           |           |
| C   | -0.285915 | 1.731363  | 0.000000  | C   | 0.000000 | 0.000000  | -2.207208 |
| C   | -0.285915 | -0.852251 | 0.679564  | C   | 0.000000 | 1.292922  | -1.710216 |
| C   | -0.285915 | -0.852251 | -0.679564 | C   | 0.000000 | 0.000000  | -0.773476 |
| C   | -1.414338 | -1.604388 | 0.000000  | C   | 0.000000 | -1.292922 | -1.710216 |
| Fe  | 0.666290  | 0.516666  | 0.000000  | Fe  | 0.000000 | 0.000000  | 1.228374  |
| H   | -2.453712 | -1.271030 | 0.000000  | H   | 0.000000 | 0.388393  | 3.234491  |
| H   | -1.237325 | -2.697139 | 0.000000  | H   | 0.000000 | -0.388393 | 3.234491  |
| 39s |           |           |           |     |          |           |           |
| C   | 0.000000  | 0.000000  | -3.982106 |     |          |           |           |
| C   | 0.000000  | 0.000000  | -2.614241 |     |          |           |           |
| C   | 0.000000  | 0.000000  | -1.352902 |     |          |           |           |
| C   | 0.000000  | 0.000000  | -0.055241 |     |          |           |           |
| Fe  | 0.000000  | 0.000000  | 1.678179  |     |          |           |           |
| H   | 0.000000  | 1.402314  | 2.197141  |     |          |           |           |
| H   | 0.000000  | -1.402314 | 2.197141  |     |          |           |           |

**Table S5.** Cartesian coordinates of optimized geometries of  $\text{FeC}_4\text{H}_2^{2+}$  in the triplet electronic state (in Angström units) obtained using ROHF with SDD and 6-311++G(2d,2p) basis sets.

| 1t |          |           |           | 2t |           |           |           |
|----|----------|-----------|-----------|----|-----------|-----------|-----------|
| C  | 0.000000 | 1.865449  | -0.880508 | C  | 0.000000  | 0.000000  | -2.745979 |
| C  | 0.000000 | 0.695563  | -1.123010 | C  | 0.000000  | 0.756046  | -1.476615 |
| C  | 0.000000 | -0.695563 | -1.123010 | C  | 0.000000  | -0.756046 | -1.476615 |
| C  | 0.000000 | -1.865449 | -0.880508 | C  | 0.000000  | 0.000000  | -0.360518 |
| H  | 0.000000 | 2.925148  | -0.746599 | Fe | 0.000000  | 0.000000  | 1.653100  |
| H  | 0.000000 | -2.925148 | -0.746599 | H  | 0.916034  | 0.000000  | -3.311117 |
| Fe | 0.000000 | 0.000000  | 0.982131  | H  | -0.916034 | 0.000000  | -3.311117 |
| 3t |          |           |           | 4t |           |           |           |
| C  | 0.000000 | 0.802015  | -1.755424 | C  | -2.331797 | -0.569765 | 0.000001  |
| C  | 0.000000 | -0.802015 | -1.755424 | C  | -1.013041 | -0.699463 | 0.000000  |
| C  | 0.000000 | 1.113560  | -0.524034 | C  | -1.771279 | 0.660222  | 0.000000  |
| C  | 0.000000 | -1.113560 | -0.524034 | C  | -0.562966 | 1.153240  | 0.000000  |
| Fe | 0.000000 | 0.000000  | 1.259621  | Fe | 1.092920  | -0.175606 | 0.000000  |
| H  | 0.000000 | 1.324343  | -2.698324 | H  | 2.829283  | 0.650179  | -0.380592 |
| H  | 0.000000 | -1.324343 | -2.698324 | H  | 2.829283  | 0.650178  | 0.380593  |

**Table S6.** Cartesian coordinates of optimized geometries of  $\text{FeC}_4\text{H}_2^{2+}$  in the quintet electronic state (in Angström units) obtained using ROHF with SDD and 6-311++G(2d,2p) basis sets.

| 1q |           |           |           | 2q |           |           |           |
|----|-----------|-----------|-----------|----|-----------|-----------|-----------|
| C  | 0.000000  | 0.000000  | -2.790069 | C  | 0.000000  | 0.892823  | -1.399766 |
| C  | 0.000000  | 0.754352  | -1.519461 | C  | -0.969850 | 0.000000  | -0.862076 |
| C  | 0.000000  | -0.754352 | -1.519461 | C  | 0.000000  | -0.892823 | -1.399766 |
| C  | 0.000000  | 0.000000  | -0.401658 | C  | 0.969850  | 0.000000  | -0.862076 |
| Fe | 0.000000  | 0.000000  | 1.695903  | Fe | 0.000000  | 0.000000  | 1.194849  |
| H  | 0.916035  | 0.000000  | -3.354794 | H  | 0.000000  | 1.811352  | -1.961984 |
| H  | -0.916035 | 0.000000  | -3.354794 | H  | 0.000000  | -1.811352 | -1.961984 |
| 3q |           |           |           | 4q |           |           |           |
| C  | 0.000000  | 1.158305  | -0.992589 | C  | 0.000000  | 0.706185  | -2.042402 |
| C  | 0.769830  | 0.000000  | -1.198734 | C  | 0.000000  | -0.706185 | -2.042402 |
| C  | -0.769830 | 0.000000  | -1.198734 | C  | 0.000000  | 0.743314  | -0.610582 |
| C  | 0.000000  | -1.158305 | -0.992589 | C  | 0.000000  | -0.743314 | -0.610582 |
| Fe | 0.000000  | 0.000000  | 1.117467  | Fe | 0.000000  | 0.000000  | 1.440995  |
| H  | 0.000000  | 2.157146  | -1.379131 | H  | 0.000000  | 1.457727  | -2.815034 |
| H  | 0.000000  | -2.157146 | -1.379131 | H  | 0.000000  | -1.457727 | -2.815034 |

**Table S7.** Total energy (in a.u), point group, zero-point correction (in a.u), ZPVE corrected total energy (E+ZPVE; in a.u), relative energy ( $\Delta E + \text{ZPVE}$ ; in kcal mol<sup>-1</sup>), dipole moment (in Debye), the number of imaginary frequencies (NImag), the expectation value of the total spin,  $\langle S^2 \rangle$  and calculated %error for spin contamination of FeC<sub>4</sub>H<sub>2</sub><sup>2+</sup> in their corresponding triplet electronic state calculated using (U)ωB97X–D functional with SDD and 6-311++G(2d,2p) basis sets.

| Isomer | Energy(a.u)  | Point Group     | Zero correction(a.u) | E+ZPVE (a.u) | $\Delta E + \text{ZPVE}$ (a.u) | $\Delta E + \text{ZPVE}$ (kcal/mol) | $ \mu $ Debye | Nimag | $\langle S^2 \rangle$ | %error( $\Delta$ ) |
|--------|--------------|-----------------|----------------------|--------------|--------------------------------|-------------------------------------|---------------|-------|-----------------------|--------------------|
| 1t     | -276.5994616 | C <sub>2v</sub> | 0.039074             | -276.560388  | 0                              | 0                                   | 0.7687        | 0     | 3.484484              | 74.224             |
| 2t     | -276.5730412 | C <sub>s</sub>  | 0.037363             | -276.535678  | 0.02471                        | 15.50575898                         | 1.835         | 0     | 3.102027              | 55.101             |
| 3t     | -276.5571365 | C <sub>2v</sub> | 0.036949             | -276.520188  | 0.0402                         | 25.22588065                         | 0.324         | 0     | 3.036149              | 51.807             |
| 4t     | -276.5545701 | C <sub>s</sub>  | 0.037046             | -276.517524  | 0.042864                       | 26.89756588                         | 3.2764        | 0     | 3.028073              | 51.404             |
| 5t     | -276.542751  | C <sub>2v</sub> | 0.036522             | -276.506229  | 0.054159                       | 33.98528533                         | 0.0667        | 0     | 3.047113              | 52.356             |
| 6t     | -276.5372374 | C <sub>s</sub>  | 0.038093             | -276.499145  | 0.061243                       | 38.43056241                         | 2.6017        | 0     | 3.857944              | 92.897             |
| 7t     | -276.5138829 | C <sub>2v</sub> | 0.037147             | -276.476736  | 0.083652                       | 52.4924221                          | 0.7009        | 0     | 2.85293               | 42.647             |
| 8t     | -276.5139298 | C <sub>1</sub>  | 0.040042             | -276.473888  | 0.0865                         | 54.27956907                         | 1.7737        | 0     | 2.472009              | 23.600             |
| 9t     | -276.5107029 | C <sub>s</sub>  | 0.037468             | -276.473235  | 0.087153                       | 54.68933275                         | 1.0944        | 0     | 3.087718              | 54.386             |
| 10t    | -276.507312  | C <sub>2v</sub> | 0.03752              | -276.469792  | 0.090596                       | 56.84984785                         | 0.8467        | 1     | 3.108095              | 55.405             |
| 11t    | -276.5065662 | C <sub>2v</sub> | 0.040291             | -276.466275  | 0.094113                       | 59.05679866                         | 1.2364        | 0     | 2.123818              | 6.191              |
| 12t    | -276.5002374 | C <sub>s</sub>  | 0.039397             | -276.46084   | 0.099548                       | 62.46731262                         | 0.785         | 0     | 2.21914               | 10.957             |
| 13t    | -276.4816416 | C <sub>∞v</sub> | 0.029367             | -276.452275  | 0.108113                       | 67.84193122                         | 1.6534        | 2     | 3.97294               | 98.647             |
| 14t    | -276.4869775 | C <sub>s</sub>  | 0.037409             | -276.449569  | 0.110819                       | 69.53997185                         | 0.7839        | 0     | 3.036699              | 51.835             |
| 15t    | -276.4709338 | C <sub>s</sub>  | 0.035886             | -276.435048  | 0.12534                        | 78.65203684                         | 1.8423        | 1     | 2.188823              | 9.441              |
| 16t    | -276.4556008 | C <sub>s</sub>  | 0.033543             | -276.422058  | 0.13833                        | 86.80338485                         | 0.9934        | 0     | 3.649029              | 82.451             |
| 17t    | -276.4425235 | C <sub>s</sub>  | 0.034412             | -276.408111  | 0.152277                       | 95.55525941                         | 1.6689        | 0     | 4.013586              | 100.679            |
| 18t    | -276.4237408 | C <sub>s</sub>  | 0.035727             | -276.388014  | 0.172374                       | 108.1663172                         | 0.6518        | 0     | 2.876221              | 43.811             |
| 19t    | -276.4212597 | C <sub>s</sub>  | 0.03574              | -276.38552   | 0.174868                       | 109.7313258                         | 1.8957        | 0     | 2.868263              | 43.413             |
| 20t    | -276.414054  | C <sub>s</sub>  | 0.033738             | -276.380316  | 0.180072                       | 112.9968851                         | 1.6528        | 1     | 3.13925               | 56.962             |
| 21t    | -276.4016117 | C <sub>2v</sub> | 0.028268             | -276.373343  | 0.187045                       | 117.3725086                         | 3.5121        | 1     | 3.882687              | 94.134             |
| 22t    | -276.4040746 | C <sub>2v</sub> | 0.0363               | -276.367774  | 0.192614                       | 120.8671089                         | 2.7037        | 2     | 3.78448               | 89.224             |
| 23t    | -276.400137  | C <sub>2v</sub> | 0.036683             | -276.363454  | 0.196934                       | 123.5779498                         | 0.1534        | 0     | 2.027017              | 1.351              |
| 24t    | -276.3949545 | D <sub>∞h</sub> | 0.034043             | -276.360911  | 0.199477                       | 125.1737063                         | 0             | 2     | 3.829017              | 91.451             |
| 25t    | -276.393331  | C <sub>s</sub>  | 0.035332             | -276.357999  | 0.202389                       | 127.0010139                         | 3.472         | 1     | 3.192583              | 59.629             |
| 26t    | -276.3780194 | C <sub>2v</sub> | 0.032126             | -276.345893  | 0.214495                       | 134.5976436                         | 1.8584        | 2     | 3.707389              | 85.369             |
| 27t    | -276.3744789 | C <sub>s</sub>  | 0.028688             | -276.345791  | 0.214597                       | 134.6616495                         | 2.1175        | 0     | 3.967814              | 98.391             |
| 28t    | -276.3711398 | C <sub>s</sub>  | 0.033692             | -276.337448  | 0.22294                        | 139.896961                          | 3.82          | 0     | 3.411628              | 70.581             |
| 29t    | -276.3697092 | C <sub>2v</sub> | 0.032789             | -276.33692   | 0.223468                       | 140.228286                          | 3.9182        | 2     | 3.640274              | 82.014             |
| 30t    | -276.3603695 | C <sub>2v</sub> | 0.033446             | -276.326924  | 0.233464                       | 146.5008707                         | 0.8358        | 1     | 2.661644              | 33.082             |
| 31t    | -276.2341859 | C <sub>2v</sub> | 0.027217             | -276.206969  | 0.353419                       | 221.773769                          | 2.4268        | 1     | 2.288686              | 14.434             |

**Table S8.** Total energy (in a.u), point group, zero-point correction (in a.u), ZPVE corrected total energy (E+ZPVE; in a.u), relative energy ( $\Delta E + \text{ZPVE}$ ; in kcal mol<sup>-1</sup>), dipole moment (in Debye), the number of imaginary frequencies (NImag), the expectation value of the total spin,  $\langle S^2 \rangle$  and calculated %error for spin contamination of FeC<sub>4</sub>H<sub>2</sub><sup>2+</sup> in their corresponding quintet electronic state calculated using (U)ωB97X–D functional with SDD and 6-311++G(2d,2p) basis sets.

| Isomer | Energy(a.u)  | Point Group     | Zero correction(a.u) | E+ZPVE(a.u) | $\Delta E + \text{ZPVE(a.u)}$ | $\Delta E + \text{ZPVE(kcal/mol)}$ | $ \mu $ Debye | Nimag | $\langle S^2 \rangle$ | %error( $\Delta$ ) |
|--------|--------------|-----------------|----------------------|-------------|-------------------------------|------------------------------------|---------------|-------|-----------------------|--------------------|
| 1q     | -276.6166351 | C <sub>2v</sub> | 0.037086             | -276.579549 | 0                             | 0                                  | 0.6393        | 0     | 6.033383              | 0.556              |
| 2q     | -276.6135374 | C <sub>s</sub>  | 0.038268             | -276.575269 | 0.00428                       | 2.685740527                        | 2.0744        | 0     | 6.020776              | 0.346              |
| 3q     | -276.5930383 | C <sub>2v</sub> | 0.038127             | -276.554912 | 0.024637                      | 15.45995079                        | 3.1707        | 1     | 6.011035              | 0.184              |
| 4q     | -276.5741543 | C <sub>2v</sub> | 0.03993              | -276.534225 | 0.045324                      | 28.44123917                        | 2.7959        | 0     | 6.007305              | 0.122              |
| 5q     | -276.5649685 | C <sub>s</sub>  | 0.037827             | -276.527142 | 0.052407                      | 32.88588874                        | 0.7852        | 0     | 6.255859              | 4.264              |
| 6q     | -276.5625568 | C <sub>s</sub>  | 0.039181             | -276.523376 | 0.056173                      | 35.2490894                         | 2.4625        | 0     | 6.009071              | 0.151              |
| 7q     | -276.5499091 | C <sub>1</sub>  | 0.038945             | -276.510964 | 0.068585                      | 43.03773693                        | 3.8661        | 0     | 6.00806               | 0.134              |
| 8q     | -276.5500295 | C <sub>1</sub>  | 0.039121             | -276.510909 | 0.06864                       | 43.07224995                        | 0.3283        | 0     | 6.010209              | 0.170              |
| 9q     | -276.5341532 | C <sub>s</sub>  | 0.037813             | -276.49634  | 0.083209                      | 52.21443541                        | 2.5186        | 1     | 6.851908              | 14.198             |
| 10q    | -276.5149133 | C <sub>2v</sub> | 0.03934              | -276.475574 | 0.103975                      | 65.24529704                        | 1.5343        | 1     | 6.025566              | 0.426              |
| 11q    | -276.5134145 | C <sub>s</sub>  | 0.038014             | -276.4754   | 0.104149                      | 65.35448369                        | 2.6555        | 0     | 6.039035              | 0.651              |
| 12q    | -276.5080959 | C <sub>2v</sub> | 0.034882             | -276.473214 | 0.106335                      | 66.72621939                        | 1.4181        | 2     | 6.02375               | 0.396              |
| 13q    | -276.4972468 | C <sub>2v</sub> | 0.035421             | -276.461826 | 0.117723                      | 73.87229722                        | 0.5967        | 1     | 6.02958               | 0.493              |
| 14q    | -276.4992438 | C <sub>2v</sub> | 0.037591             | -276.461653 | 0.117896                      | 73.98085636                        | 0.1703        | 0     | 6.025435              | 0.424              |
| 15q    | -276.4766828 | C <sub>2v</sub> | 0.029344             | -276.447339 | 0.13221                       | 82.9630269                         | 2.0761        | 2     | 7.009057              | 16.818             |
| 16q    | -276.4188288 | C <sub>s</sub>  | 0.029829             | -276.389    | 0.190549                      | 119.5713018                        | 2.2322        | 2     | 6.590486              | 9.841              |
| 17q    | -276.3912874 | C <sub>2v</sub> | 0.028127             | -276.363161 | 0.216388                      | 135.785519                         | 3.3188        | 2     | 6.805229              | 13.420             |
| 18q    | -276.3814498 | C <sub>s</sub>  | 0.03269              | -276.34876  | 0.230789                      | 144.8222828                        | 1.6729        | 1     | 6.212063              | 3.534              |
| 19q    | -276.3798743 | C <sub>2v</sub> | 0.031434             | -276.348441 | 0.231108                      | 145.0224584                        | 1.6836        | 0     | 6.778556              | 12.976             |
| 20q    | -276.3668015 | C <sub>s</sub>  | 0.032759             | -276.334042 | 0.245507                      | 154.0579672                        | 0.8663        | 0     | 6.694701              | 11.578             |
| 21q    | -276.3541483 | C <sub>s</sub>  | 0.028685             | -276.325463 | 0.254086                      | 159.4413709                        | 2.1693        | 3     | 6.932344              | 15.539             |
| 22q    | -276.3555894 | C <sub>2v</sub> | 0.035064             | -276.320525 | 0.259024                      | 162.5400127                        | 0.211         | 1     | 6.281732              | 4.696              |
| 23q    | -276.3411154 | C <sub>2v</sub> | 0.032692             | -276.308423 | 0.271126                      | 170.1341323                        | 1.6494        | 1     | 6.440915              | 7.349              |
| 24q    | -276.3335756 | C <sub>s</sub>  | 0.032745             | -276.300831 | 0.278718                      | 174.8981842                        | 2.7004        | 3     | 6.190754              | 3.179              |
| 25q    | -276.3243873 | C <sub>2v</sub> | 0.024602             | -276.299785 | 0.279764                      | 175.5545591                        | 1.3749        | 3     | 6.666643              | 11.111             |
| 26q    | -276.2971748 | D <sub>2h</sub> | 0.035115             | -276.26206  | 0.317489                      | 199.2273538                        | 0             | 0     | 6.05478               | 0.913              |
| 27q    | -276.2917557 | C <sub>s</sub>  | 0.031509             | -276.260247 | 0.319302                      | 200.3650285                        | 1.7671        | 1     | 7.128387              | 18.806             |
